# Supplementary material
Source: Springer Nature journal article supplement (https://www.springermedizin.de/resource/supplementary/12885_2008_1260_MOESM1_ESM.pdf/9471570)
Supplement: MOESM1 [file 9471570]

## Supplementary material

Wedrén et al – Estrogen receptor alpha gene polymorphism and endometrial cancer risk- a case-control study

**Supplementary table 1 PCR primers used to genotype the estrogen receptor alpha gene**

| Polymorphism                                  | Sequence 5' -> 3' and modifications              |                                                |
|-----------------------------------------------|--------------------------------------------------|------------------------------------------------|
|                                               | Forward                                          | Reverse                                        |
| Promotor Rs2234670 <sup>a</sup>               | <i>HEX</i> - GAT TAT AGA CGC ATG ATA TAC TTC ACC | GGA TAT GCA GAA TCA AAT ATC CAG ATG            |
| Intron 1 rs2234693 and rs9340799 <sup>b</sup> | ( <i>Bio</i> -) GTG TTG TCC ATC AGT TCA TCT      | ( <i>Bio</i> -) AGA ACC ATT AGA GAC CAA TGC    |
| Exon 3 rs4986934 (MB) <sup>c</sup>            | CCA ACC AGT GCA CCA TTG ATA                      | CCT TTC ATC ATT CCC ACT TCG                    |
| Exon 3 rs4986934 <sup>d</sup>                 | AAC AGG AGG AAG AGC TGC CAG GC                   | <i>Bio</i> - CTT TCA TCA TTC CCA CTT CGT AGC A |
| Exon 4 rs1801132 (MB) <sup>c</sup>            | CAG ATG GTC AGT GCC TTG TTG GA                   | CGA AGC TTC ACT GAA GGG TCT GG                 |
| Exon 4 rs1801132 <sup>d</sup>                 | TGA CGG CCG ACC AGA TGG TCA GT                   | <i>Bio</i> - AGG GTC TGG TAG GAT CAT ACT CGG   |

<sup>a</sup> Forward primer labeled with 6-carboxyhexachlorofluorescein (HEX) to enable detection on the sequencing instrument. <sup>b</sup> Primers used for minisequencing with fluorescence polarization detection. For validation by solid-phase minisequencing one of the PCR primers was substituted by a biotinylated (Bio) primer with the same sequence to enable solid-phase capture on streptavidin coated microtiter plates. <sup>c</sup> Primers optimized for the molecular beacon assay (MB) <sup>d</sup> For validation by solid-phase minisequencing we used a second pair of PCR primers, of which the reverse primer was biotinylated (Bio) to enable solid-phase capture on streptavidin coated microtiter plates.

**Supplementary table 2 Primers and probes used for genotyping the estrogen receptor alpha gene**

| Assay            | Polymorphism                    |            | Sequence 5' -> 3' and modification                    |
|------------------|---------------------------------|------------|-------------------------------------------------------|
| Minisequencing   | Intron 1 rs2234693 <sup>a</sup> | Non-coding | TGG GAA ACA GAG ACA AAG CAT AAA AC                    |
|                  |                                 | Coding     | CAT CTG AGT TCC AAA TGT CCC AGC                       |
| Minisequencing   | Intron 1 rs9340799 <sup>a</sup> | Non-coding | GAC CAA TGC TCA TCC CAA CTC                           |
|                  |                                 | Coding     | TCC CAG AGA CCC TGA GTG TGG TCT                       |
| Molecular Beacon | Exon 3 rs4986934 <sup>b</sup>   |            | FAM - ccg agc CGG CTC CGC AAA TGC TAg ctc gg - DABCYL |
|                  |                                 |            | TET - ccg agc CGG CTC CGT AAA TGC TAg ctc gg - DABCYL |
| Molecular Beacon | Exon 4 rs1801132 <sup>b</sup>   |            | FAM - cca agc GAG CCC CCC ATA CTC TAg ctt gg - DABCYL |
|                  |                                 |            | TET - cca agc GAG CCC CCG ATA CTC TAg ctt gg - DABCYL |
| Minisequencing   | Exon 3 rs4986934 <sup>c</sup>   |            | TGC CAG GCC TGC CGG CTC CG                            |
| Minisequencing   | Exon 4 rs1801132 <sup>c</sup>   |            | TTG TTG GAT GCT GAG CCC CC                            |

<sup>a</sup> Primers used for minisequencing with fluorescence polarization detection in both directions and for validation by solid-phase minisequencing. <sup>b</sup> Two molecular beacon probes, each corresponding to one of the variable nucleotides and labeled with 5-carboxyfluorescein (FAM) or 6-carboxytetrachlorofluorescein (TET) and dimethylaminophenylazobenzoic acid (DABCYL) were used in the same reaction in the molecular beacon assay. Small letters indicate the stem part and bold letters indicate the nucleotide complementary to the SNP position <sup>c</sup> Primers used for validation by solid-phase minisequencing.

**Supplementary table 3 Odds ratios for endometrial cancer associated with various genotypes of the *ESRI* rs9340799 and 95% confidence intervals from logistic regression models using homozygous for the most common allele (AA) as the reference, stratified by DNA source.**

|            | Unadjusted |                  |                  | Adjusted* |                  |                  |
|------------|------------|------------------|------------------|-----------|------------------|------------------|
|            | A/A        | A/G              | G/G              | A/A       | A/G              | G/G              |
| DNA source |            |                  |                  |           |                  |                  |
| Blood      | 1 (ref)    | 0.76 (0.61-0.96) | 0.63 (0.44-0.92) | 1 (ref)   | 0.74 (0.59-0.94) | 0.58 (0.39-0.85) |
| Tissue     | 1 (ref)    | 0.98 (0.62-1.57) | 0.35 (0.12-1.01) | 1 (ref)   | 0.88 (0.54-1.43) | 0.29 (0.1-0.88)  |

\* Adjusted for parity (continuous), BMI (continuous), smoking (ever, never) and use of oral contraceptives (ever, never)

**Supplementary table 4 Odds ratios associated with various genotypes of the *ESRI* rs9340799 and 95% confidence intervals from logistic regression models with homozygous for the most common allele (AA) as the reference group, stratified by myometrial invasion and grade.**

|                     | Unadjusted |                  |                  | Adjusted* |                  |                  |
|---------------------|------------|------------------|------------------|-----------|------------------|------------------|
|                     | A/A        | A/G              | G/G              | A/A       | A/G              | G/G              |
| Myometrial invasion |            |                  |                  |           |                  |                  |
| <50%                | 1 (ref)    | 0.92 (0.71-1.21) | 0.86 (0.56-1.32) | 1 (ref)   | 0.87 (0.65-1.14) | 0.79 (0.51-1.22) |
| >50%                | 1 (ref)    | 0.69 (0.47-1.00) | 0.38 (0.18-0.82) | 1 (ref)   | 0.67 (0.45-0.98) | 0.35 (0.16-0.75) |
| Grade               |            |                  |                  |           |                  |                  |
| Grade 1             | 1 (ref)    | 0.73 (0.52-1.02) | 0.92 (0.56-1.49) | 1 (ref)   | 0.68 (0.49-0.96) | 0.84 (0.51-1.38) |
| Grade 2             | 1 (ref)    | 0.78 (0.58-1.04) | 0.33 (0.17-0.63) | 1 (ref)   | 0.73 (0.54-0.99) | 0.29 (0.15-0.56) |
| Grade 3             | 1 (ref)    | 0.84(0.54-1.31)  | 0.58 (0.26-1.31) | 1 (ref)   | 0.85 (0.54-1.34) | 0.46 (0.2-1.09)  |

\* Adjusted for parity (continuous), BMI (continuous), smoking (ever, never) and use of oral contraceptives (ever, never)
